# Supplementary material for: Assessing the Benefits of Nature-Inspired Algorithms for the Parameterization of ANN in the Prediction of Water Demand
Source: Atypon-hosted journal article supplement (doi:10.1061/(asce)wr.1943-5452.0001602), 2022-11-07
Supplement: supplemental_material_wr.1943-5452.0001602_zubaidi.pdf [file supplemental_material_wr.1943-5452.0001602_zubaidi.pdf]

## SUPPLEMENTAL MATERIALS

*ASCE Journal of Water Resources Planning Management*

# Assessing the Benefits of Nature-Inspired Algorithms for the Parameterization of ANN in the Prediction of Water Demand

Salah L. Zubaidi, Nabeel Saleem Saad Al-Bdairi, Sandra Ortega-Martorell, Hussein Mohammed Ridha, Nadhir Al-Ansari, Hussein Al-Bugarbee, Khalid Hashim, and Sadik Kamel Gharghan

**DOI:** 10.1061/(ASCE)WR.1943-5452.0001602

© ASCE 2022

[www.ascelibrary.org](http://www.ascelibrary.org)

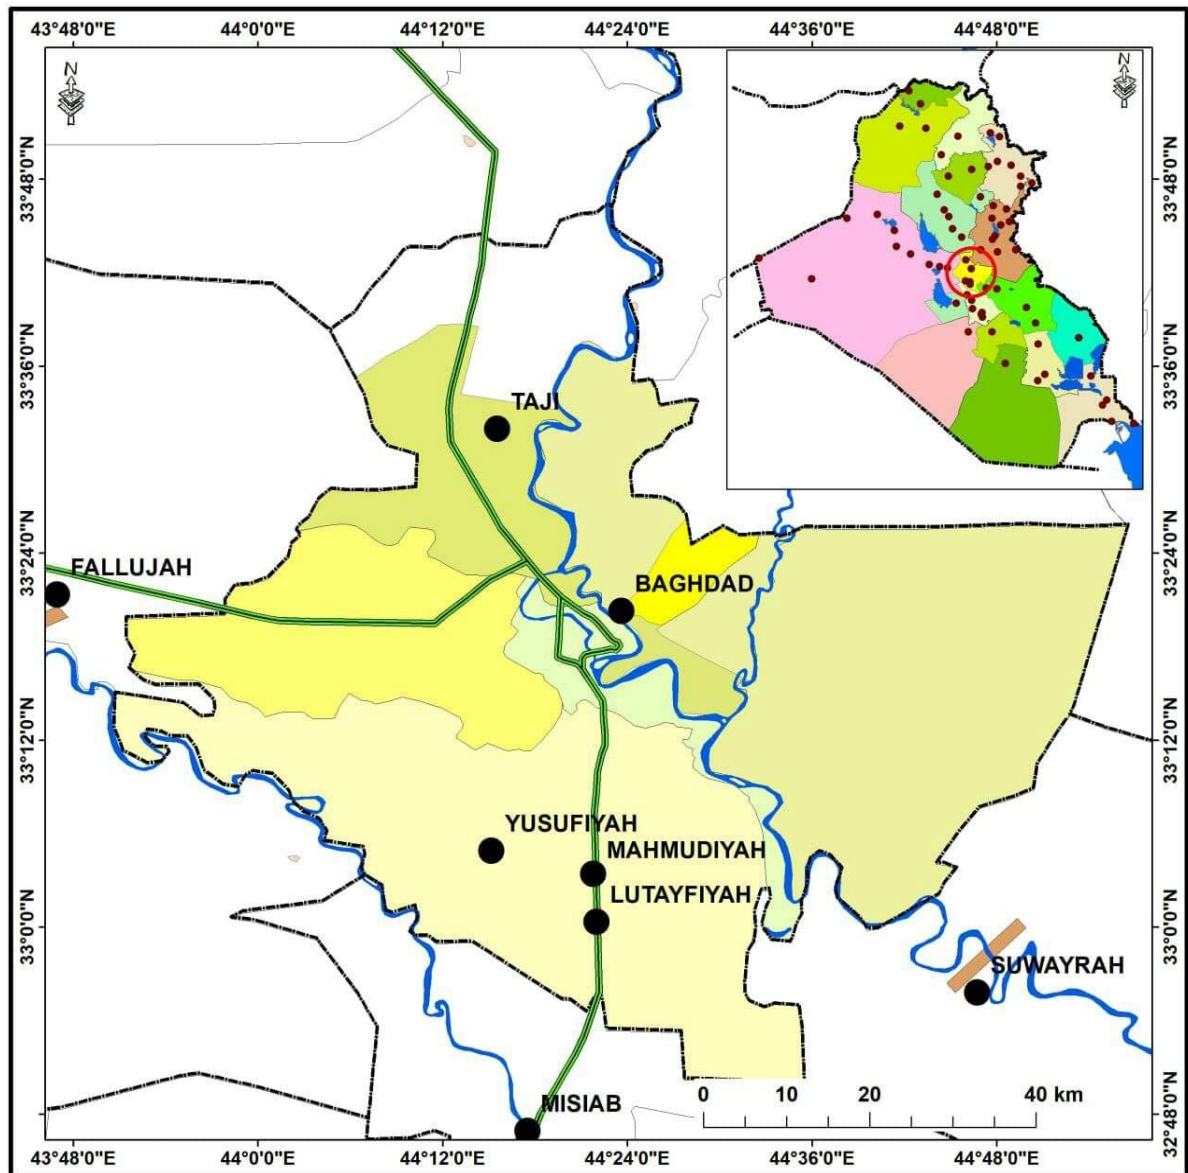

**Fig. S1.** The location of Baghdad City.

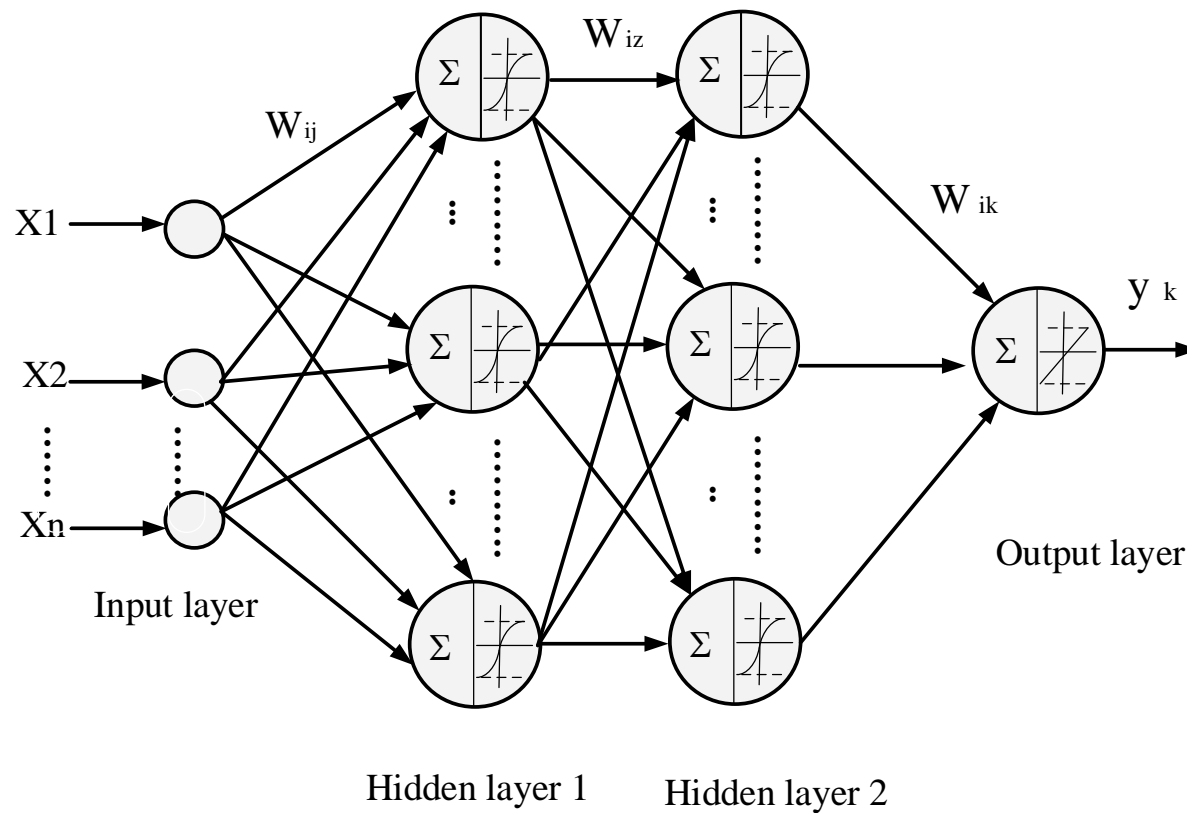

**Fig. S2.** Structure of the ANN.

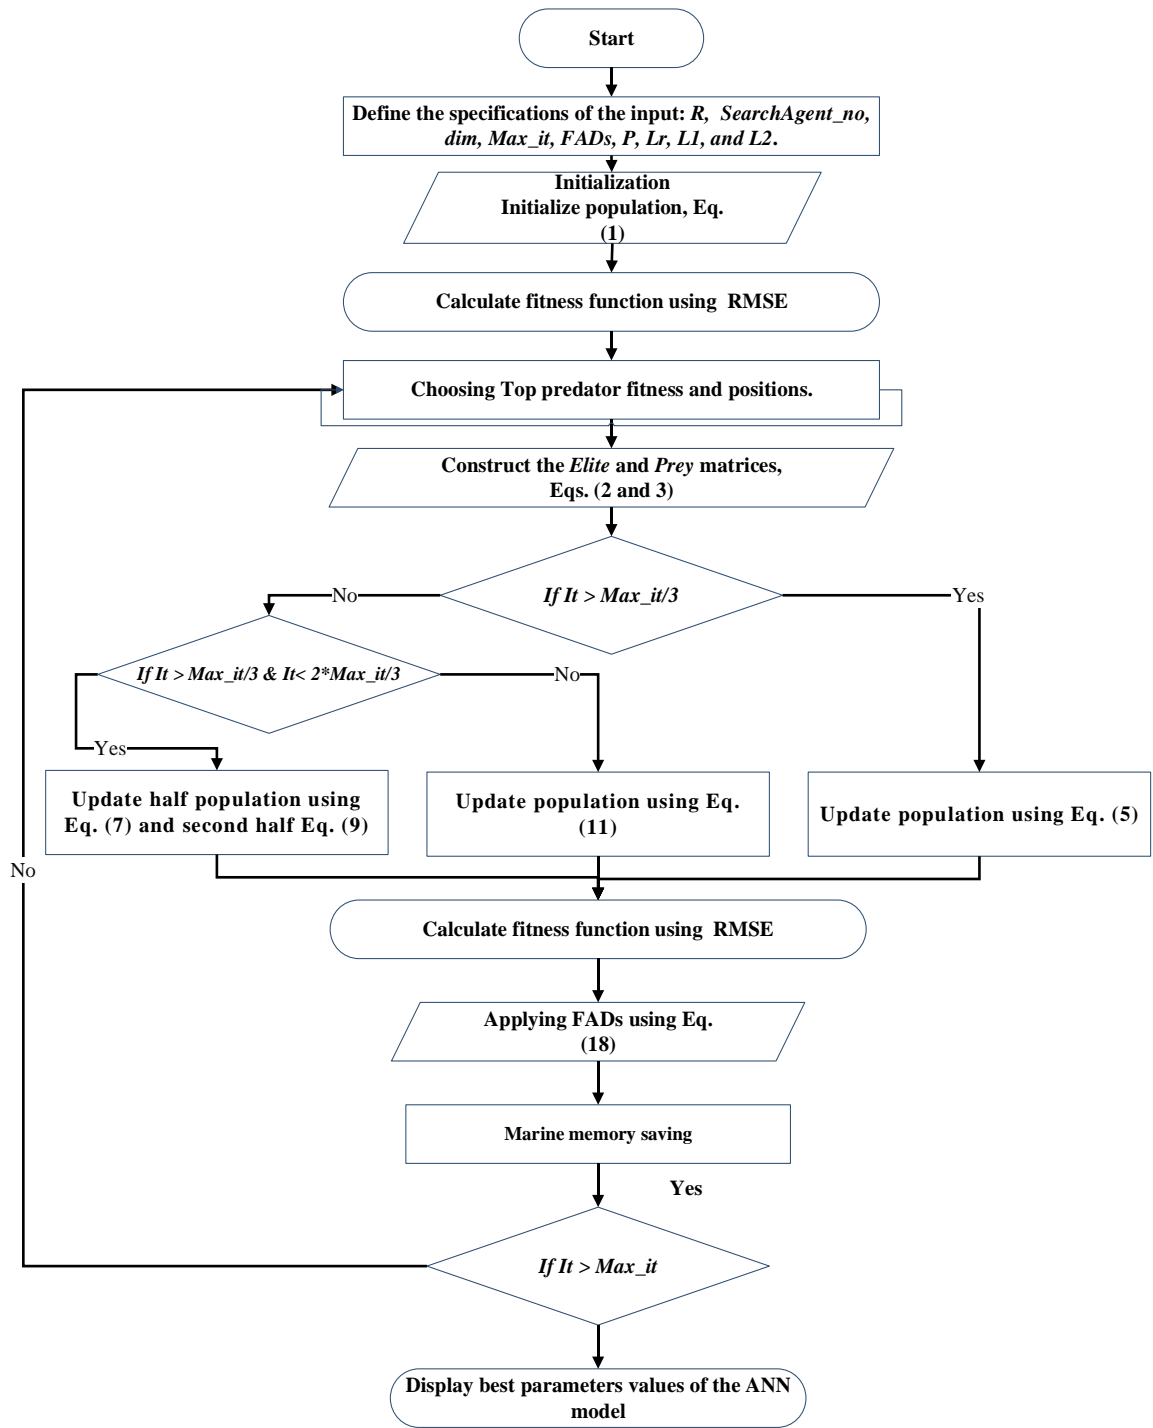

**Fig. S3.** Flowchart of the proposed MPA-ANN algorithm.

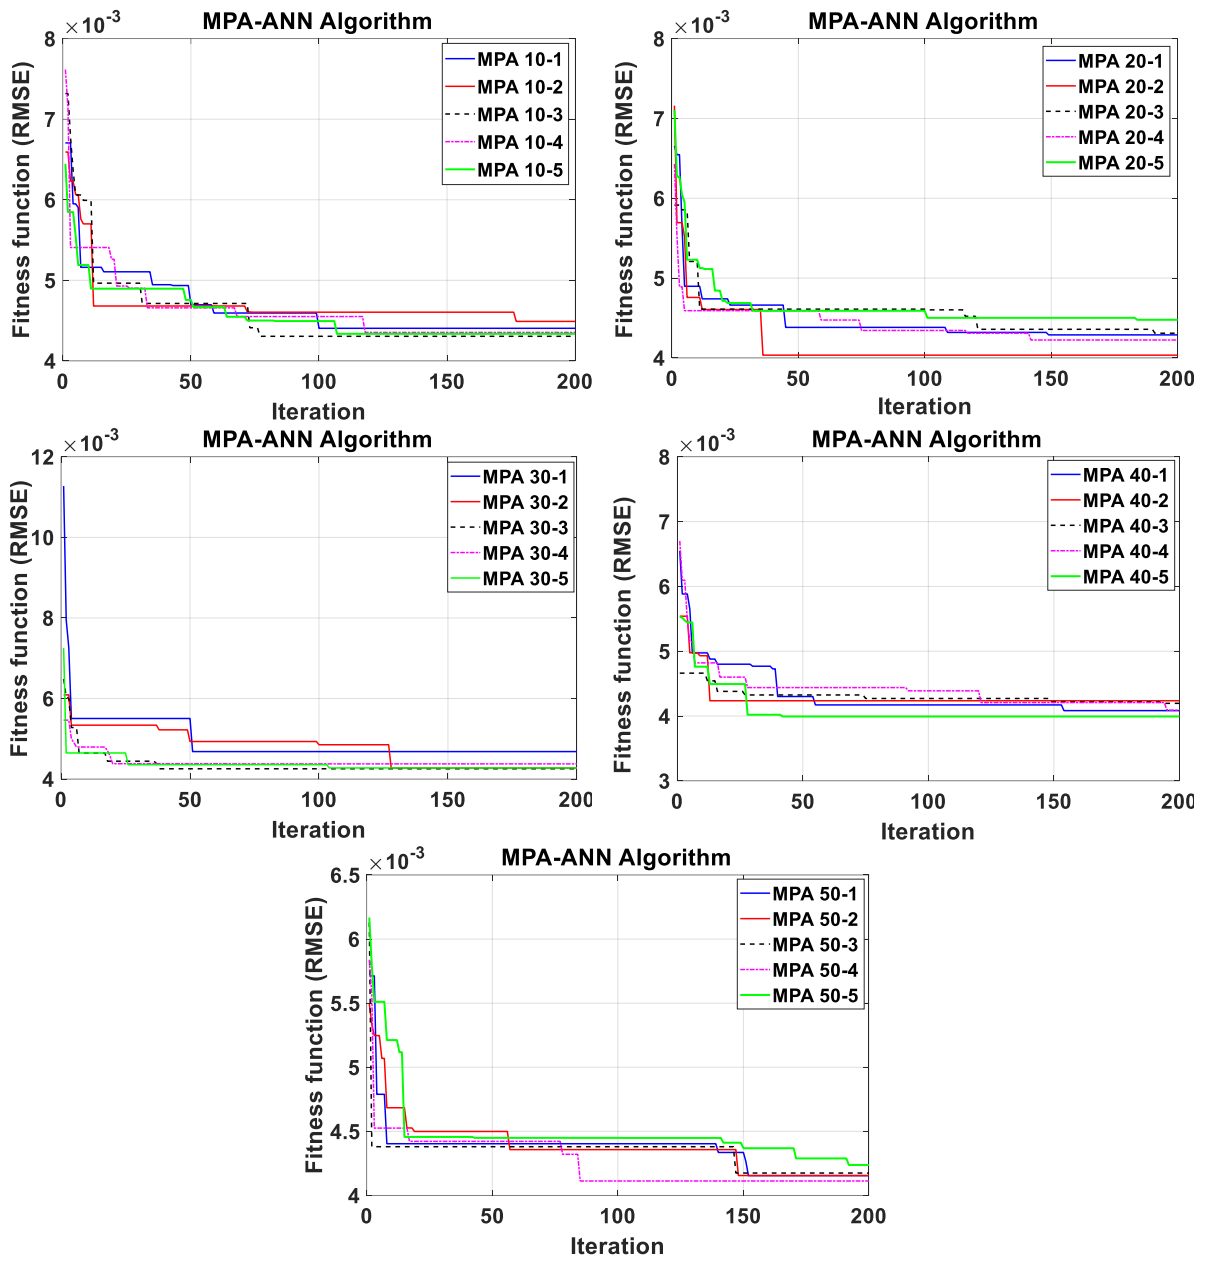

**Fig. S4.** Performance of MPA-ANN algorithm with five times run for each swarm.

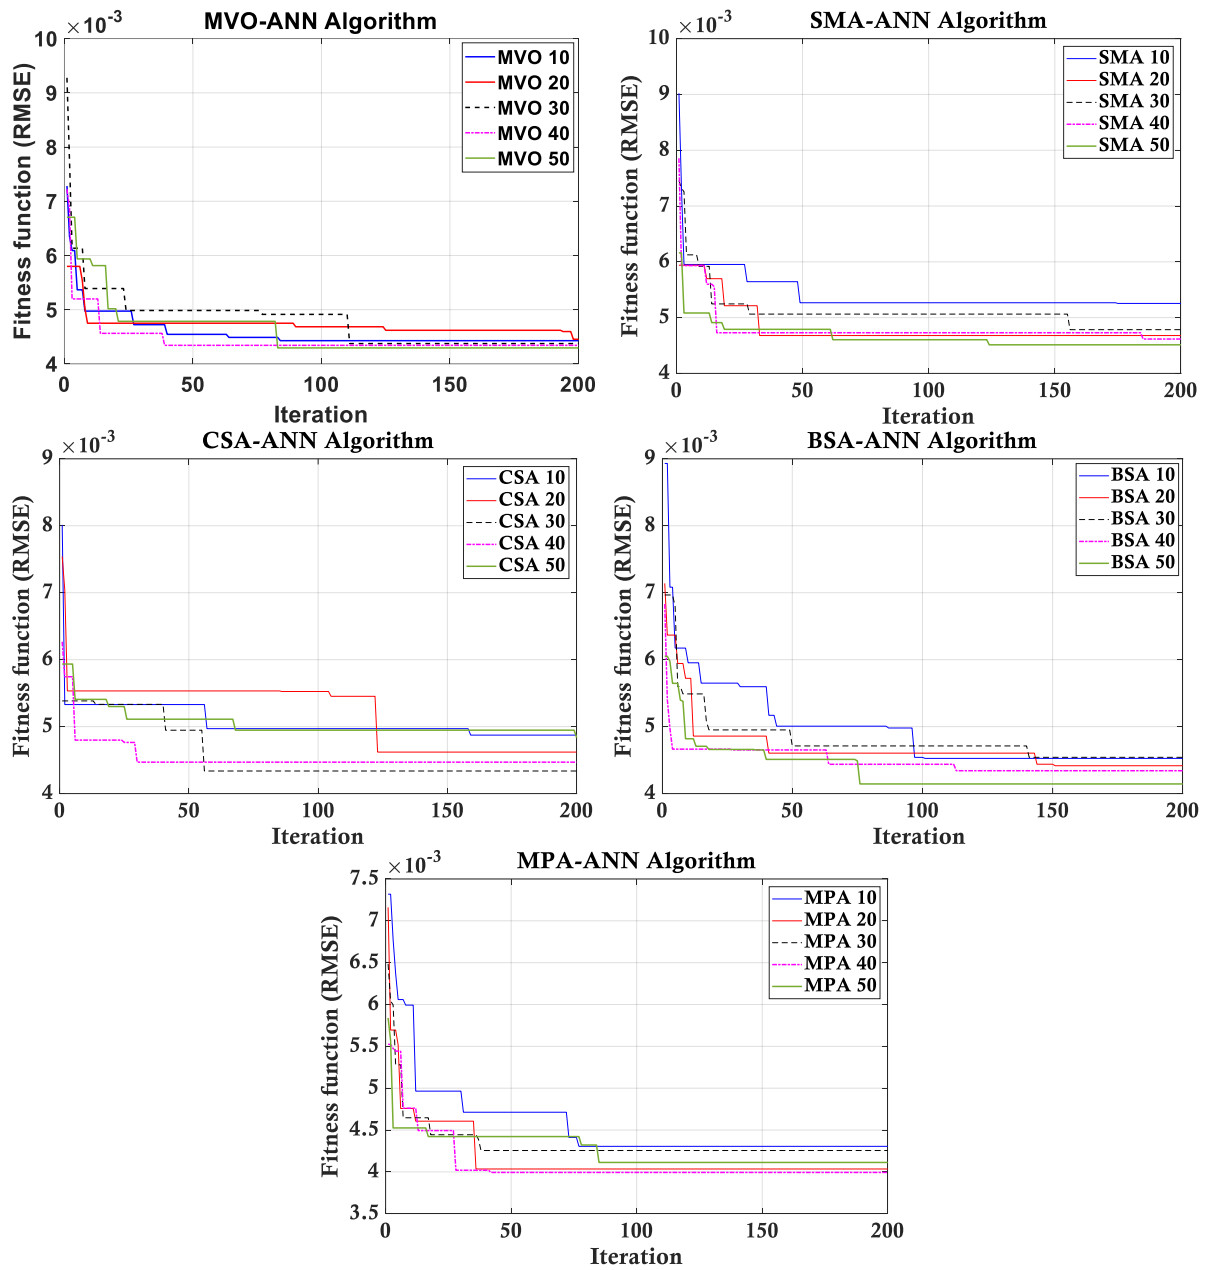

**Fig. S5.** Performance of ANN and five metaheuristic algorithms.
